# Supplementary material for: Unification of lower and upper critical solution temperature phase behavior of globular protein solutions in the presence of multivalent cations
Source: Royal Society of Chemistry journal article supplement (doi:10.1039/c9sm02329a), 2020-01-01
Supplement: c9sm02329a4.pdf [file c9sm02329a4.pdf]

## Supplementary information

For

# Unification of Lower and Upper Critical Solution Temperature Phase Behavior of Globular Protein Solutions in the Presence of Multivalent Cations

Nafisa Begam,<sup>a</sup> Olga Matsarskaia,<sup>a,c</sup> Michael Sztucki,<sup>b</sup> Fajun Zhang,<sup>a</sup> and Frank Schreiber<sup>a</sup>

<sup>a</sup>*Institut für Angewandte Physik, Universität Tübingen, 72076 Tübingen, Germany*

<sup>b</sup>*ESRF - The European Synchrotron, 71 Avenue des Martyrs, 38000 Grenoble, France*

<sup>c</sup>*Present address: Institut Laue-Langevin, 71 Avenue des Martyrs, 38042 Grenoble, France*

Video S1: Phase separation of the BLG-YCl<sub>3</sub> samples with  $c_p$  of 40 mg/ml,  $c_s$  of 4 mM (right sample), and 10 mM (left sample) in a cold water bath (left beaker) and in a hot water bath (right beaker) with 4X playback speed.

Video S2\_LCST: Microscopic video collected during LCST phase transition of the BLG-YCl<sub>3</sub> solution with  $c_p$  of 40 mg/ml and  $c_s$  of 4 mM. The total real time of the video is 150 sec.

Video S3\_UCST: Microscopic video collected during UCST phase transition of the BLG-YCl<sub>3</sub> solution with  $c_p$  of 40 mg/ml and  $c_s$  of 10 mM. The total real time of the video is 360 sec.

**SAXS data analysis to quantify the interaction:** We have fitted the SAXS data using a sticky hard sphere (SHS) model with an ellipsoidal form factor. The interaction potential between the particles is given by [1,2]

$$\beta U(r) = \begin{cases} \infty & r < \sigma = 2R \\ -\beta u_0 = \ln\left(\frac{12\tau\Delta}{\sigma+\Delta}\right) & \sigma < r < \sigma + \Delta \\ 0 & r > \sigma + \Delta \end{cases} \quad \text{----- (1)}$$

where  $R$  is the particle radius,  $\tau$  is the stickiness parameter,  $\Delta$  is the width of the square well and  $\beta = 1/k_B T$ . In the limit of  $\Delta \rightarrow 0$ , the reduced second virial coefficient  $\frac{B_2}{B_2^{HS}}$  is given by

$$\lim_{\Delta \rightarrow 0} \frac{B_2}{B_2^{HS}} = 1 - \frac{1}{4\tau} \quad \text{----- (2)}$$

where  $B_2^{HS}$  is the second virial coefficient of a hard sphere. Here, positive  $B_2$  values correspond to repulsive interactions and negative  $B_2$  values correspond to attractive interactions. Typical fits of the SAXS data to the above model are shown in Fig. S1.

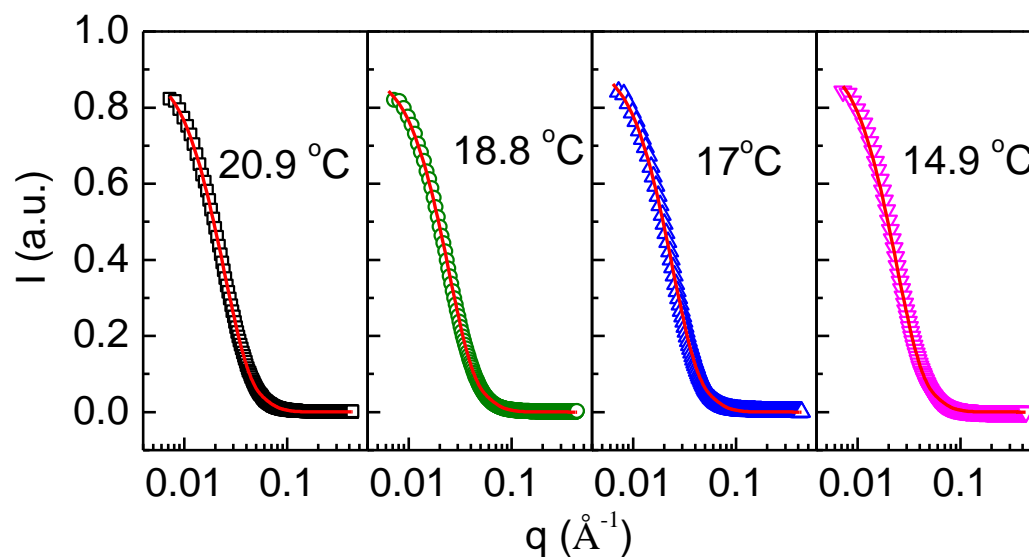

Figure S1: Typical fits (red solid lines) to the SAXS data (symbols) of the BLG-YCl<sub>3</sub> sample with  $c_p = 6.6$  mg/ml and  $c_s = 2.5$  mM (UCST type) at different temperatures as indicated by the legends in the respective panels.

In this model, it is important to note that, the stickiness parameter,  $\tau$  (related to the second virial coefficient) is mutually dependent on the dimension of the particle,  $R$  [1,2]. Therefore, in the current analysis, we used an ellipsoidal form factor (reflecting clusters of protein molecules) with the two axis lengths fixed at 41 Å and 86Å [3,4] and obtained the interaction parameter,  $B_2/B_2^{HS}$  for the sample BLG-YCl<sub>3</sub> with  $c_p = 6.6$  mg/ml and  $c_s = 2.5$  mM exhibiting UCST behavior (Fig. 3 of the main manuscript) which is shown in Fig. S2.

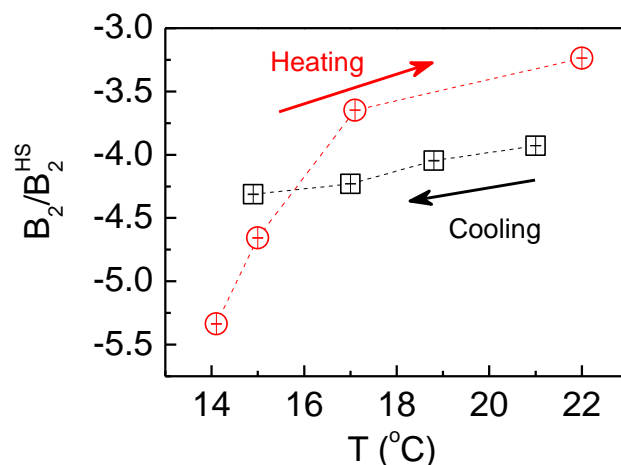

Figure S2: Reduced second virial coefficient as a function of temperature obtained from the SHS model fit to the SAXS profiles of BLG-YCl<sub>3</sub> samples with  $c_p = 6.6$  mg/ml and  $c_s = 2.5$  mM showing an increase in the values of  $B_2$  with decreasing temperature. Error bars are smaller than the symbols.

Fig. S2 indicates that the strength of the attraction (values of  $B_2/B_2^{HS}$ ) increases with decreasing temperature which could be responsible for the UCST behavior. The enhanced reduction in the case of heating could possibly be due to the fact that during cooling the particles start precipitating. This results in a change of the effective cluster size and the volume fraction which can lead to a change in the effective inter-particle interaction.

**SAXS data fit for BSA-YCl<sub>3</sub> samples:** Typical fits for the BSA-YCl<sub>3</sub> samples with  $c_p = 100$  mg/ml and  $c_s = 10$  mM and 100mM are represented in Fig. S3 (a-b). The reduced second virial coefficients for these samples are shown in Fig. S3(c). In this case, one axis of the ellipsoidal particle is kept fixed at 18 Å and the other axis is not constrained [5].

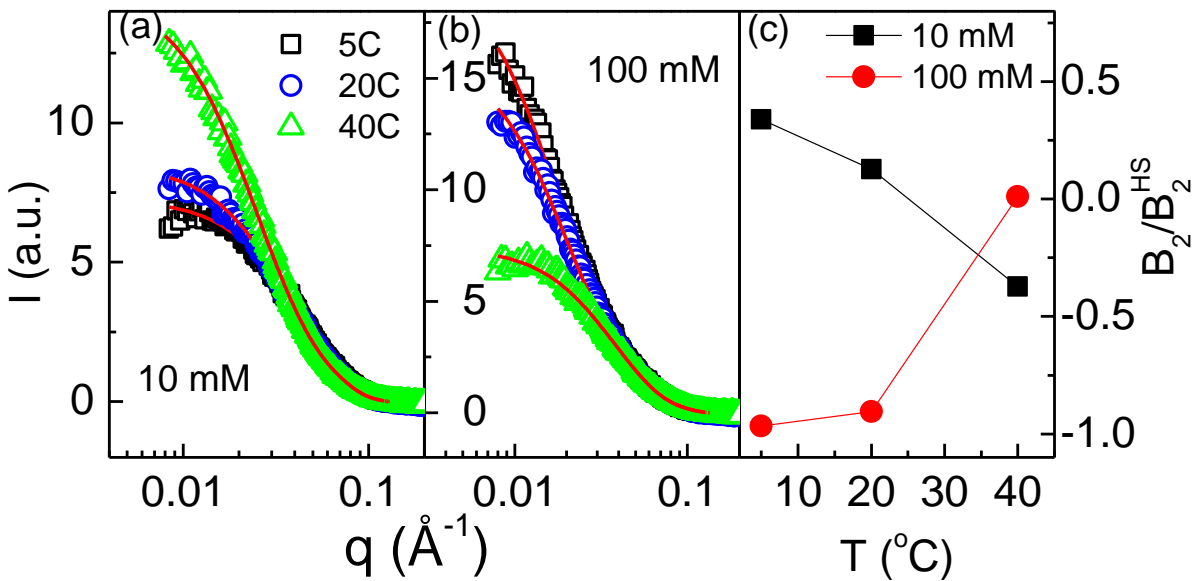

Figure S3: Typical fits (red solid lines) to the SAXS data (symbols) of the BSA-YCl<sub>3</sub> sample with  $c_p = 100$  mg/ml, (a)  $c_s = 10$  mM and (b)  $c_s = 100$  mM at different temperatures as indicated by the legends, and (c) reduced second virial coefficient as a function of temperature for  $c_s = 10$  mM (black symbols) indicating an increase in attraction with increasing temperature (similar to an LCST) and for  $c_s = 100$  mM (red symbols) indicating an increase in attraction with decreasing temperature (similar to a UCST). Error bars are smaller than the symbols.

We can see in Fig. S3(c) that the sample with low  $c_s$  (10mM) shows an increasingly attractive interaction with increasing temperature indicating the possibility of an LCST type behavior. On the other hand, the sample with high  $c_s$  (100 mM) exhibits an increase in attraction with decreasing temperature which indicates the possibility of a UCST behavior.

#### References:

1. Baxter, J. Chem. Phys., 1968, 49, 2770–2774.
2. Menon et al., J. Chem. Phys., 1991, 95, 9186–9190
3. A. Sauter et al., J. Phys. Chem. B, 2016, 120, 24, 5564-5571
4. Zhang et al., Faraday Discuss., 2012, 159, 313–325
5. Braun et al. J. Phys. Chem. B, 2017, 121, 1731–1739
